# Supplementary material for: Effectiveness of Immune Checkpoint Inhibitor with Anti-PD-1 Monotherapy or in Combination with Ipilimumab in Younger versus Older Adults with Advanced Melanoma
Source: MDPI journal article supplement (doi:10.3390/curroncol30100646), 2023-09-30
Supplement: s1 [file s1]

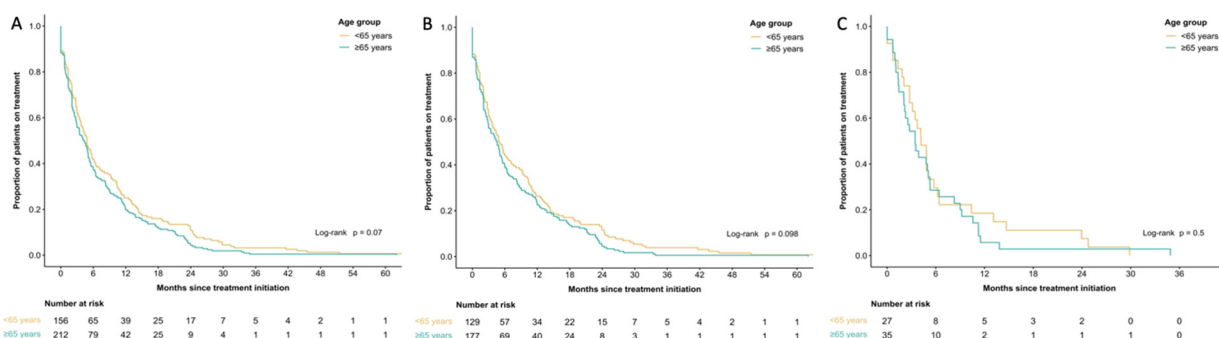

**Figure S1.** Kaplan-Meier curves of treatment duration amongst patients aged <65 and ≥65 years-old excluding combination immunotherapy for all melanoma (A), cutaneous melanoma only (B), and non-cutaneous melanoma only (C).

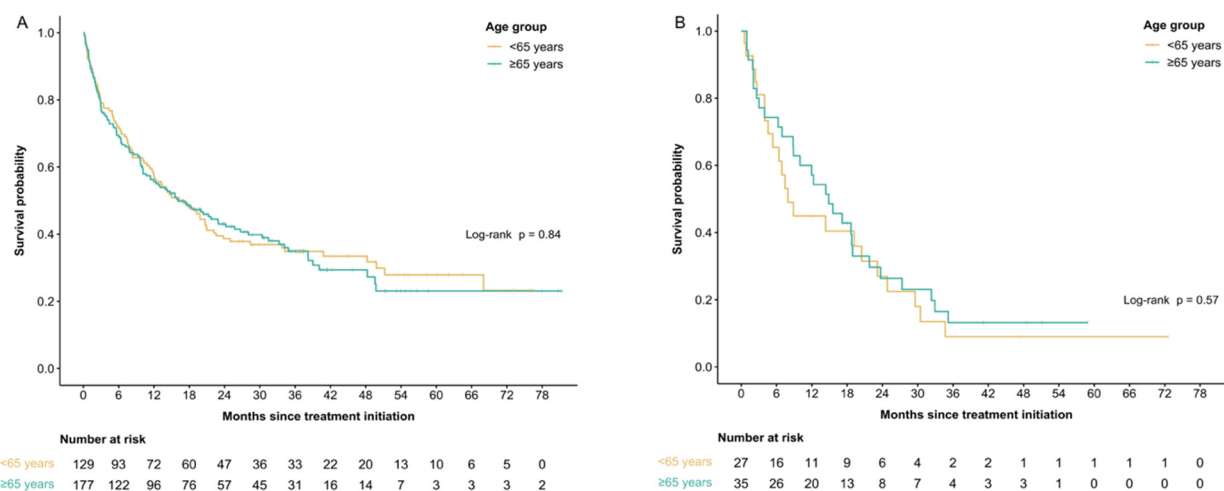

**Figure S2.** Kaplan – Meier curves for median overall survival amongst patients aged <65 and ≥65 years-old, when patients receiving combination immunotherapy were excluded for cutaneous melanoma patients only (A), and non-cutaneous melanoma only (B).

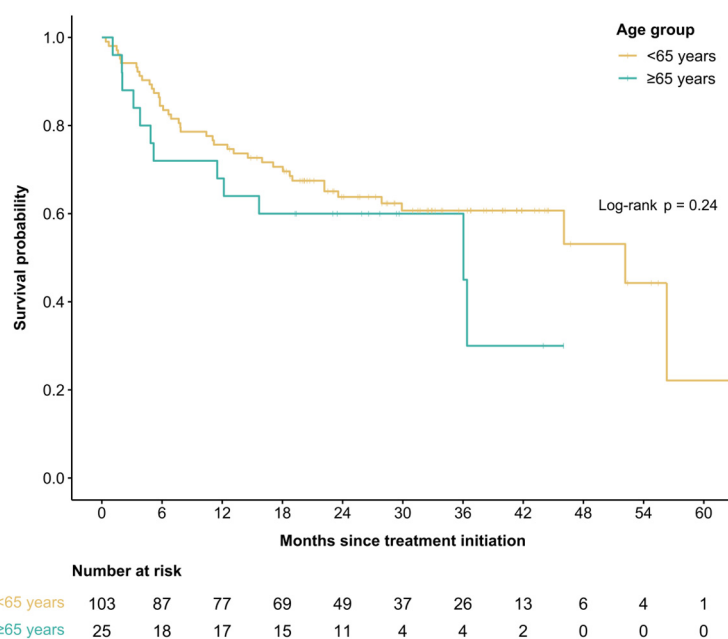

**Figure S3.** Kaplan – Meier curves for median overall survival amongst patients aged <65 and ≥65 years-old when stratified by patients treated with combination immunotherapy (ipilimumab and nivolumab).

**Supplemental Table S1.** Univariate and multivariate analyses of baseline factors associated with overall survival in all patients.

| Characteristic                                   | Univariate Cox regression model, all patients |                  | Multivariate Cox regression model, all patients |                  |
|--------------------------------------------------|-----------------------------------------------|------------------|-------------------------------------------------|------------------|
|                                                  | OS HR (95% CI)                                | p-value          | OS HR (95% CI)                                  | p-value          |
| <b>Age</b>                                       |                                               |                  |                                                 |                  |
| <65 (reference) vs. ≥65                          | 1.27 (1.01-1.58)                              | <b>0.04</b>      | 1.02 (0.77-1.34)                                | 0.92             |
| <b>Sex</b>                                       |                                               |                  |                                                 |                  |
| Female (reference) vs. Male                      | 1.10 (0.87-1.39)                              | 0.43             | 1.21 (0.92-1.59)                                | 0.17             |
| <b>IO drug</b>                                   |                                               |                  |                                                 |                  |
| Anti-PD-1 (reference) vs. Ipilimumab + nivolumab | 0.48 (0.36-0.65)                              | <b>&lt;0.001</b> | 0.58 (0.40-0.85)                                | <b>0.006</b>     |
| <b>Melanoma type</b>                             |                                               |                  |                                                 |                  |
| Cutaneous (reference) vs. Non-cutaneous          | 1.47 (1.11-1.95)                              | <b>0.008</b>     | 1.38 (1.00-1.91)                                | 0.05             |
| <b>Treatment line</b>                            |                                               |                  |                                                 |                  |
| First (reference) vs. Other                      | 1.84 (1.46-2.32)                              | <b>&lt;0.001</b> | 1.44 (1.08-1.92)                                | <b>0.01</b>      |
| <b>dNLR</b>                                      |                                               |                  |                                                 |                  |
| ≤3 (reference) vs. >3                            | 2.13 (1.63-2.79)                              | <b>&lt;0.001</b> | 1.48 (1.07-2.04)                                | <b>0.02</b>      |
| <b>LDH</b>                                       |                                               |                  |                                                 |                  |
| Normal (reference) vs. Elevated                  | 2.28 (1.77-2.94)                              | <b>&lt;0.001</b> | 2.03 (1.56-2.64)                                | <b>&lt;0.001</b> |
| <b>ECOG status</b>                               |                                               |                  |                                                 |                  |
| <2 (reference) vs. ≥2                            | 2.36 (1.76-3.18)                              | <b>&lt;0.001</b> | 1.54 (1.06-2.23)                                | <b>0.02</b>      |
| <b>M stage</b>                                   |                                               |                  |                                                 |                  |
| 1a/1b (reference) vs. 1c/1d                      | 1.90 (1.51-2.39)                              | <b>&lt;0.001</b> | 1.45 (1.11-1.90)                                | <b>0.007</b>     |

**Supplemental Table S2.** Univariate and multivariate analyses of baseline factors associated with overall survival in cutaneous patients.

| Characteristic                                   | Univariate Cox regression model |                  | Multivariate Cox regression model |                  |
|--------------------------------------------------|---------------------------------|------------------|-----------------------------------|------------------|
|                                                  | OS HR (95% CI)                  | p-value          | OS HR (95% CI)                    | p-value          |
| <b>Age</b>                                       |                                 |                  |                                   |                  |
| <65 (reference) vs. ≥65                          | 1.30 (1.01-1.67)                | <b>0.04</b>      | 1.09 (0.79-1.51)                  | 0.59             |
| <b>Sex</b>                                       |                                 |                  |                                   |                  |
| Female (reference) vs. Male                      | 1.12 (0.85-1.46)                | 0.42             | 1.16 (0.85-1.59)                  | 0.35             |
| <b>dNLR</b>                                      |                                 |                  |                                   |                  |
| ≤3 (reference) vs. >3                            | 2.14 (1.59-2.87)                | <b>&lt;0.001</b> | 1.52 (1.06-2.16)                  | <b>0.02</b>      |
| <b>LDH</b>                                       |                                 |                  |                                   |                  |
| Normal (reference) vs. Elevated                  | 2.32 (1.75-3.08)                | <b>&lt;0.001</b> | 2.07 (1.54-2.77)                  | <b>&lt;0.001</b> |
| <b>ECOG status</b>                               |                                 |                  |                                   |                  |
| <2 (reference) vs. ≥2                            | 2.69 (1.93-3.75)                | <b>&lt;0.001</b> | 1.93 (1.28-2.92)                  | <b>0.002</b>     |
| <b>M stage</b>                                   |                                 |                  |                                   |                  |
| 1a/1b (reference) vs. 1c/1d                      | 1.86 (1.44-2.39)                | <b>&lt;0.001</b> | 1.35 (1.00-1.83)                  | <b>0.0499</b>    |
| <b>BRAF mutation</b>                             |                                 |                  |                                   |                  |
| No (reference) vs. Yes                           | 1.16 (0.89-1.52)                | 0.27             |                                   |                  |
| <b>IO drug</b>                                   |                                 |                  |                                   |                  |
| Anti-PD-1 (reference) vs. Ipilimumab + nivolumab | 0.50 (0.36-0.70)                | <b>&lt;0.001</b> | 0.67 (0.44-1.03)                  | 0.07             |
| <b>Treatment line</b>                            |                                 |                  |                                   |                  |
| First (reference) vs. Other                      | 1.97 (1.53-2.54)                | <b>&lt;0.001</b> | 1.66 (1.20-2.29)                  | <b>0.002</b>     |

**Supplemental Table S3.** Propensity score matching covariates by treatment group before and after matching, patients aged <65 years with cutaneous melanoma.

| Characteristic        | Pre-match             |                                   | SMD   | Post-match           |                                   | SMD    |
|-----------------------|-----------------------|-----------------------------------|-------|----------------------|-----------------------------------|--------|
|                       | Anti-PD-1,<br>N = 102 | Ipilimumab + nivolumab,<br>N = 75 |       | Anti-PD-1,<br>N = 43 | Ipilimumab + nivolumab,<br>N = 43 |        |
| <b>Sex</b>            |                       |                                   | 0.243 |                      |                                   | 0.248  |
| Female                | 46 (45.1%)            | 25 (33.3%)                        |       | 17 (39.5%)           | 12 (27.9%)                        |        |
| Male                  | 56 (54.9%)            | 50 (66.7%)                        |       | 26 (60.5%)           | 31 (72.1%)                        |        |
| <b>ECOG status</b>    |                       |                                   | 0.347 |                      |                                   | <0.001 |
| <2                    | 88 (86.3%)            | 72 (96.0%)                        |       | 40 (93.0%)           | 40 (93.0%)                        |        |
| ≥2                    | 14 (13.7%)            | 3 (4.0%)                          |       | 3 (7.0%)             | 3 (7.0%)                          |        |
| <b>LDH</b>            |                       |                                   | 0.095 |                      |                                   | 0.110  |
| Normal                | 69 (67.6%)            | 54 (72.0%)                        |       | 34 (79.1%)           | 32 (74.4%)                        |        |
| Elevated              | 33 (32.4%)            | 21 (28.0%)                        |       | 9 (20.9%)            | 11 (25.6%)                        |        |
| <b>dNLR</b>           |                       |                                   | 0.389 |                      |                                   | 0.076  |
| ≤3                    | 80 (78.4%)            | 69 (92.0%)                        |       | 38 (88.4%)           | 39 (90.7%)                        |        |
| >3                    | 22 (21.6%)            | 6 (8.0%)                          |       | 5 (11.6%)            | 4 (9.3%)                          |        |
| <b>M stage</b>        |                       |                                   | 0.033 |                      |                                   | 0.286  |
| 1a/1b                 | 50 (49.0%)            | 38 (50.7%)                        |       | 22 (51.2%)           | 28 (65.1%)                        |        |
| 1c/1d                 | 52 (51.0%)            | 37 (49.3%)                        |       | 21 (48.8%)           | 15 (34.9%)                        |        |
| <b>Treatment line</b> |                       |                                   | 1.279 |                      |                                   | <0.001 |
| First                 | 42 (41.2%)            | 69 (92.0%)                        |       | 37 (86.0%)           | 37 (86.0%)                        |        |
| Other                 | 60 (58.8%)            | 6 (8.0%)                          |       | 6 (14.0%)            | 6 (14.0%)                         |        |

**Supplemental Table S4.** Propensity score matching covariates by treatment group before and after matching, patients aged <65 years with cutaneous melanoma.

| Characteristic        | Pre-match             |                                   | SMD   | Post-match           |                                   | SMD    |
|-----------------------|-----------------------|-----------------------------------|-------|----------------------|-----------------------------------|--------|
|                       | Anti-PD-1,<br>N = 138 | Ipilimumab + nivolumab,<br>N = 18 |       | Anti-PD-1,<br>N = 17 | Ipilimumab + nivolumab,<br>N = 17 |        |
| <b>Sex</b>            |                       |                                   | 0.264 |                      |                                   | <0.001 |
| Female                | 38 (27.5%)            | 3 (16.7%)                         |       | 3 (17.6%)            | 3 (17.6%)                         |        |
| Male                  | 100 (72.5%)           | 15 (83.3%)                        |       | 14 (82.4%)           | 14 (82.4%)                        |        |
| <b>ECOG status</b>    |                       |                                   | 0.582 |                      |                                   | <0.001 |
| <2                    | 118 (85.5%)           | 18 (100.0%)                       |       | 17 (100.0%)          | 17 (100.0%)                       |        |
| ≥2                    | 20 (14.5%)            | 0 (0.0%)                          |       | 0 (0.0%)             | 0 (0.0%)                          |        |
| <b>LDH</b>            |                       |                                   | 0.015 |                      |                                   | <0.001 |
| Normal                | 91 (65.9%)            | 12 (66.7%)                        |       | 12 (70.6%)           | 12 (70.6%)                        |        |
| Elevated              | 47 (34.1%)            | 6 (33.3%)                         |       | 5 (29.4%)            | 5 (29.4%)                         |        |
| <b>dNLR</b>           |                       |                                   | 0.215 |                      |                                   | <0.001 |
| ≤3                    | 103 (74.6%)           | 15 (83.3%)                        |       | 14 (82.4%)           | 14 (82.4%)                        |        |
| >3                    | 35 (25.4%)            | 3 (16.7%)                         |       | 3 (17.6%)            | 3 (17.6%)                         |        |
| <b>M stage</b>        |                       |                                   | 0.343 |                      |                                   | <0.001 |
| 1a/1b                 | 69 (50.0%)            | 6 (33.3%)                         |       | 6 (35.3%)            | 6 (35.3%)                         |        |
| 1c/1d                 | 69 (50.0%)            | 12 (66.7%)                        |       | 11 (64.7%)           | 11 (64.7%)                        |        |
| <b>Treatment line</b> |                       |                                   | 0.856 |                      |                                   | <0.001 |
| First                 | 101 (73.2%)           | 18 (100.0%)                       |       | 17 (100.0%)          | 17 (100.0%)                       |        |
| Other                 | 37 (26.8%)            | 0 (0.0%)                          |       | 0 (0.0%)             | 0 (0.0%)                          |        |
